# Supplementary material for: Applications of the improved leader-follower cluster analysis (iLFCA) algorithm on large array (LA) and very large array (VLA) hyperspectral mid-infrared imaging datasets
Source: Royal Society of Chemistry journal article supplement (doi:10.1039/c2ra20495a), 2012-01-01
Supplement: c2ra20495a.pdf [file c2ra20495a.pdf]

## ELECTRONIC SUPPLEMENTARY INFORMATION (ESI)

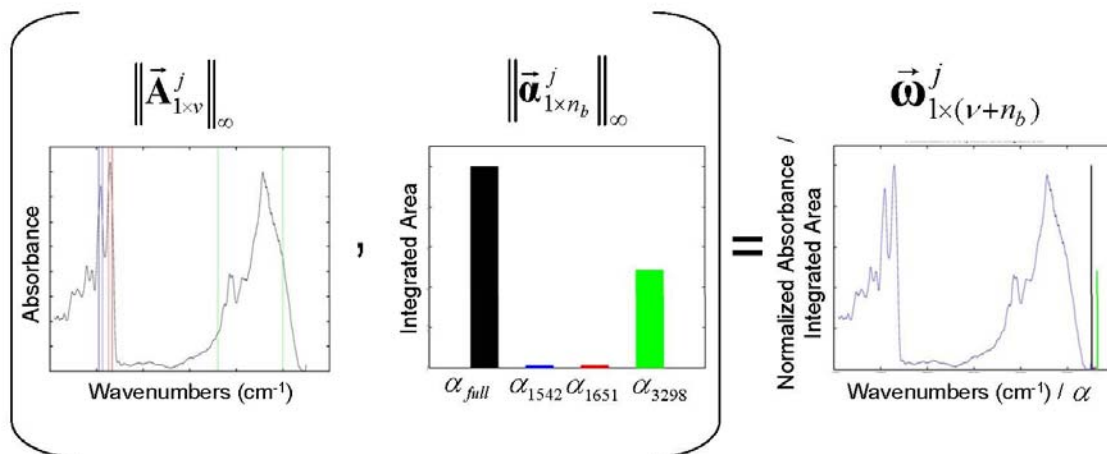

**Fig. S1** Formation of concatenated vector  $\vec{\omega}^j$  from original spectrum and characteristic spectral band integrated areas

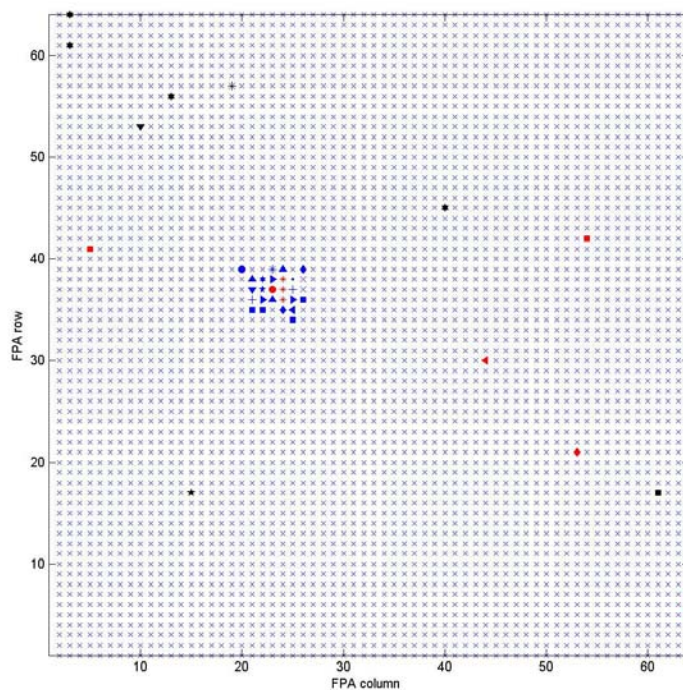

**Fig. S2:** Clustering plot for oral mucosa cells PCA (30 clusters)

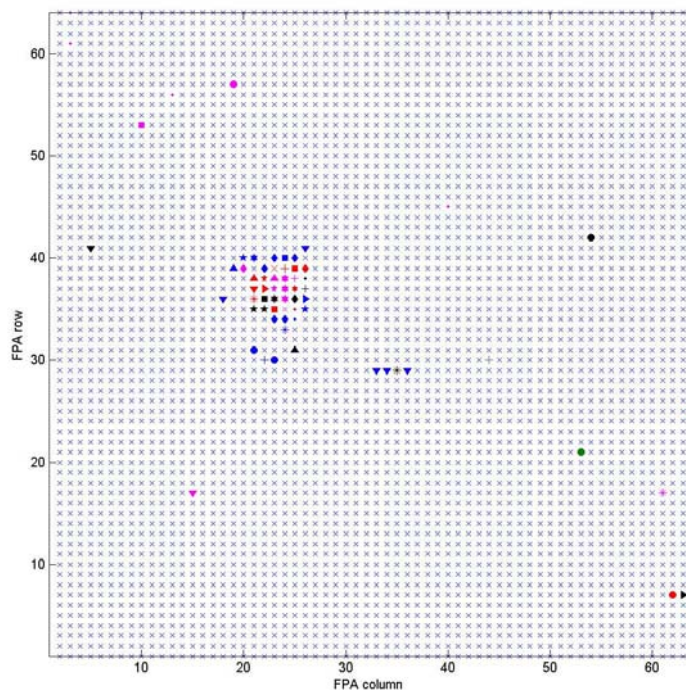

Fig. S3: Clustering plot for oral mucosa cells PCA (50 clusters)

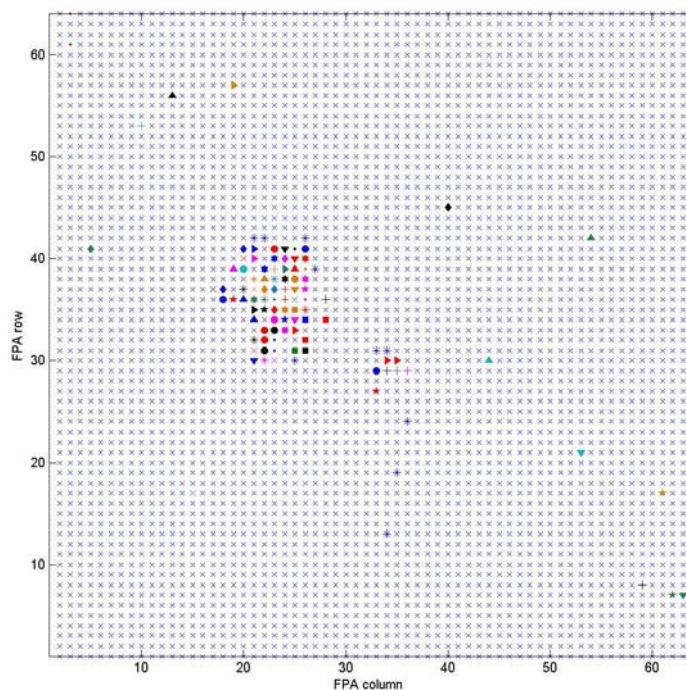

Fig. S4: Clustering plot for oral mucosa cells PCA (80 clusters)
